# Supplementary material for: CARMIL2 is a novel molecular connection between vimentin and actin essential for cell migration and invadopodia formation
Source: PubMed Central journal article supplement — Mol Biol Cell. 2015 Dec 15;26(25):4577–88. doi: 10.1091/mbc.E15-08-0552 (PMC4678016; doi:10.1091/mbc.e15-08-0552), 2015-12-15
Supplement: supp_E15-08-0552v1_CombinedSupMats.pdf [file supp_E15-08-0552v1_CombinedSupMats.pdf]

# Supplemental Materials

*Molecular Biology of the Cell*

Lanier et al.

**Table S1:** Plasmids used in this manuscript

| <b>Plasmid</b>                               | <b>pBJ #</b> |
|----------------------------------------------|--------------|
| pAcGFP1-C1                                   | 1987         |
| pAcGFP1-C1-CARMIL2                           | 2017         |
| pAcGFP1-C1-CARMIL2 N-Term                    | 2018         |
| pAcGFP1-C1-CARMIL2 C-Term                    | 2019         |
| pAcGFP1-C1-CARMIL2 PH                        | 2218         |
| pAcGFP1-C1-CARMIL2 LRR                       | 2223         |
| pAcGFP1-C1-PH1/LRR2                          | 2276         |
| pAcGFP1-C1-PH2/LRR1                          | 2277         |
| pAcGFP1-C1-PH1/LRR2/C-Term1                  | 2294         |
| pAcGFP1-C1-PH2/LRR1/C-Term2                  | 2295         |
| pAcGFP1-C1-PH1/LRRN1/LRRC2                   | 2288         |
| pAcGFP1-C1-PH1/LRRN2/LRRC1                   | 2289         |
| pAcGFP1-C1-PH2/LRRN1/LRRC2                   | 2290         |
| pAcGFP1-C1-PH2/LRRN2/LRRC1                   | 2287         |
| tdTomato-N1-Vimentin                         | 2407         |
| pFLRu-FH-GFP-Scramble shRNA                  | 1967         |
| pFLRu-FH-GFP-CARMIL2 shRNA                   | 1971         |
| pBOB-GFP-CARMIL2 shRNA-resistant             | 2299         |
| pBOB-GFP-CARMIL2 RR985/987AA shRNA-resistant | 2301         |
| pBOB-GFP-PH1/LRR2/C-Term1                    | 2305         |
| pBOB-GFP-PH2/LRR1/C-Term2 shRNA-resistant    | 2307         |
| pGEX-6P-3-CARMIL2-CBR                        | 1843         |
| p3xFlag-CARMIL2                              | 2111         |
| p3xFlag-CARMIL2 RR985/987AA                  | 2190         |
